# Supplementary material for: Silicalite-1 zeolite acidification by zinc modification and its catalytic properties for isobutane conversion
Source: Royal Society of Chemistry journal article supplement (doi:10.1039/c8ra02467g), 2018-01-01
Supplement: c8ra02467g1.pdf [file c8ra02467g1.pdf]

## Supplementary Material

### Silicalite-1 zeolite acidification by Zn modification and its catalytic properties for iso-butane conversion

Guodong Liu,<sup>a</sup> Jiayu Liu,<sup>a</sup> Ning He,<sup>a</sup> Cuilan Miao,<sup>a</sup> Jilei Wang,<sup>a</sup> Qin Xin<sup>b</sup> and Hongchen Guo<sup>\*a</sup>

<sup>a</sup> Department of Catalytic Chemistry and Engineering & State Key Laboratory of Fine Chemicals, Dalian University of Technology, Dalian 116012, P. R. China

<sup>b</sup> State Key Laboratory of Catalysis, Dalian Institute of Chemical Physics, Chinese Academy of Sciences, Dalian 116023, P. R. China

\* Corresponding author, E-mail: hongchenguo@dlut.edu.cn

**Table S1.** XRF analysis of parent S-1 zeolite.

| Elements | Compounds                      | Composition<br>/wt.% |
|----------|--------------------------------|----------------------|
| Si       | SiO <sub>2</sub>               | 99.92                |
| Na       | Na <sub>2</sub> O              | 0.034                |
| Ti       | TiO <sub>2</sub>               | 0.010                |
| Fe       | Fe <sub>2</sub> O <sub>3</sub> | 0.010                |
| Zn       | ZnO                            | 0.001                |
| Cl       | Cl                             | 0.015                |

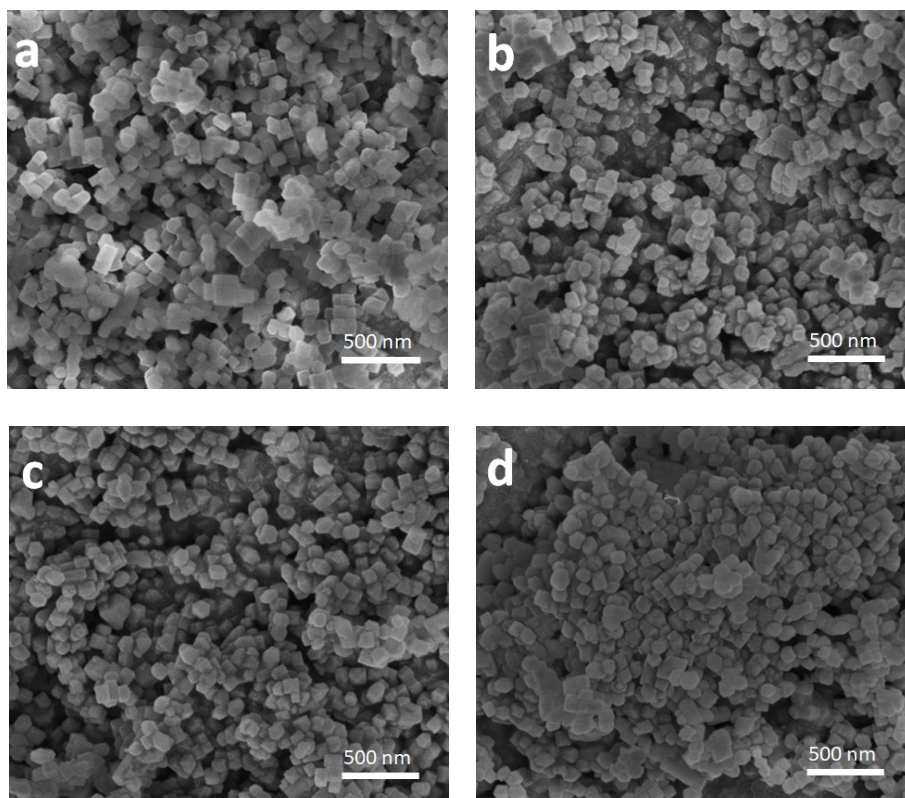

**Figure S1.** FE-SEM images of  $Zn_x/S-1$  catalysts with different Zn loading: parent S-1 zeolite (a);  $Zn_{1,0}/S-1$  (b);  $Zn_{6,0}/S-1$  (c);  $Zn_{12,0}/S-1$  (d).

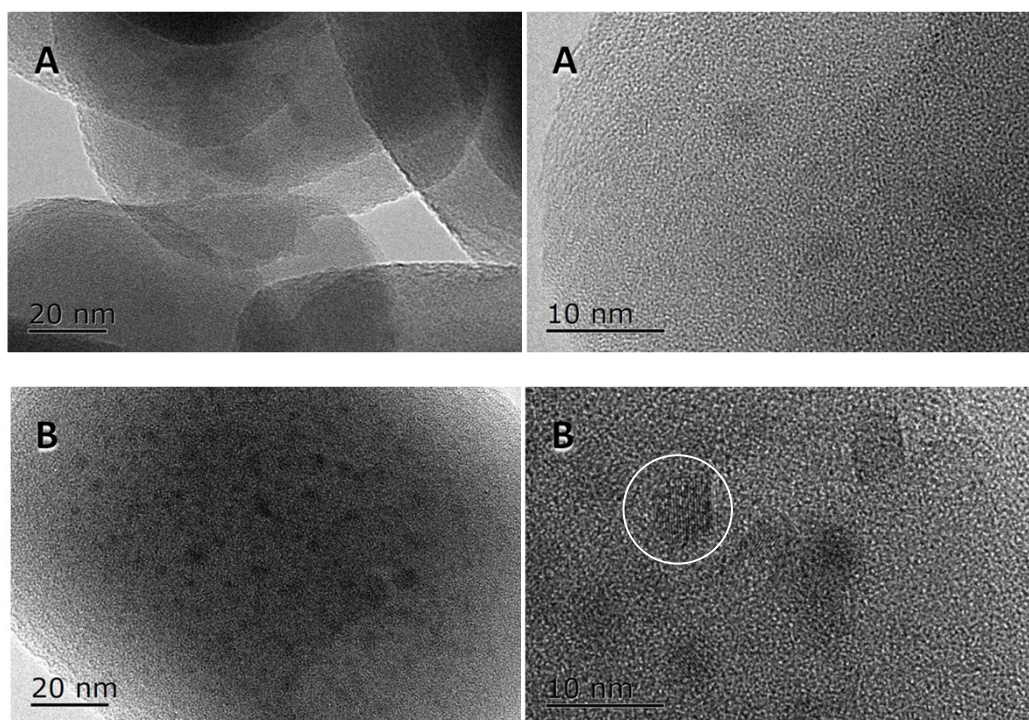

**Figure S2.** HRTEM images of  $Zn_{6,0}/S-1$  (A) and  $Zn_{12,0}/S-1$  (B).

**Table S2.** The relative crystallinity of Zn<sub>x</sub>/S-1 catalysts

| Catalysts               | Crystallinity (%) |
|-------------------------|-------------------|
| S-1                     | 100               |
| Zn <sub>1.0</sub> /S-1  | 85.1              |
| Zn <sub>3.0</sub> /S-1  | 80.3              |
| Zn <sub>6.0</sub> /S-1  | 75.2              |
| Zn <sub>8.0</sub> /S-1  | 61.8              |
| Zn <sub>12.0</sub> /S-1 | 53.5              |

**Table S3.** The acid amounts of catalysts as determined by NH<sub>3</sub>-TPD

| Catalysts                | Acid amount (mmol/g) |
|--------------------------|----------------------|
| S-1                      | 0.00367              |
| Zn <sub>1.0</sub> /S-1   | 0.0736               |
| Zn <sub>3.0</sub> /S-1   | 0.134                |
| Zn <sub>6.0</sub> /S-1   | 0.142                |
| Zn <sub>8.0</sub> /S-1   | 0.151                |
| Zn <sub>12.0</sub> /S-1  | 0.137                |
| Zn <sub>6.0</sub> /ZSM-5 | 0.555                |
| HZSM-5                   | 0.676                |

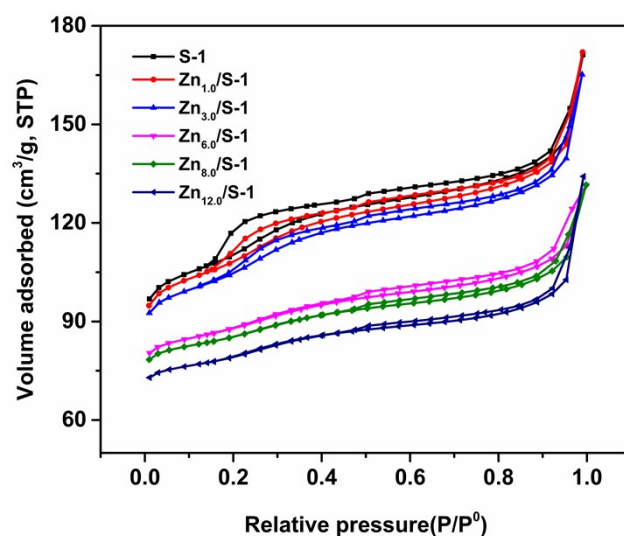**Figure S3.** N<sub>2</sub> adsorption-desorption isotherm of Zn<sub>x</sub>/S-1 (x from 0.0 to 12.0).

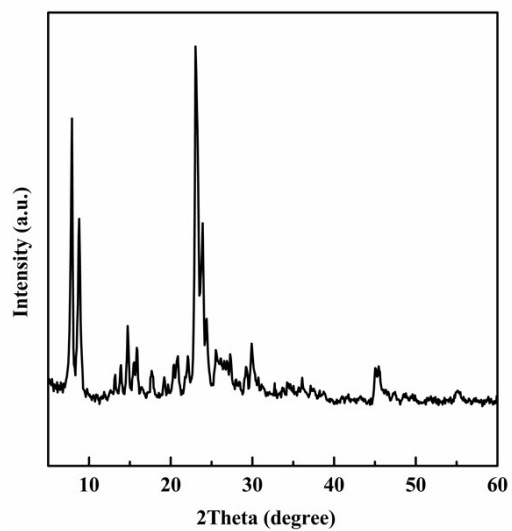

**Figure S4.** XRD pattern of H-type ZSM-5 zeolite.

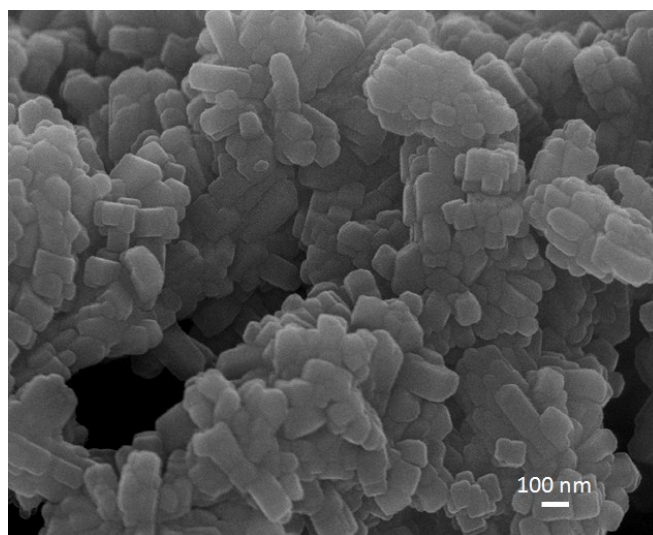

**Figure S5.** SEM images of H-type ZSM-5 zeolite under the scale bar of 100 nm.
